# Supplementary material
Source: PubMed Central journal article supplement (PMC9588533)

**Supplementary Table S1: Changes in PIMS between intervention time points by drug class**

|                                   | Absolute Change <sup>a</sup> |                     | Relative Change <sup>b</sup> |                     |
|-----------------------------------|------------------------------|---------------------|------------------------------|---------------------|
|                                   | Pre-implementation           | Post-implementation | Pre-implementation           | Post-implementation |
| Drug Class                        | n (%)                        | n (%)               | n (%)                        | n (%)               |
| Total Medication Prescribed       | 1325                         | 1108                | 14193                        | 13213               |
| Antihistamine                     | 477 (36.00%)                 | 398 (35.92%)        | 477 (3.36%)                  | 398 (3.01%)         |
| Skeletal Relaxant                 | 437 (32.98%)                 | 312 (28.16%)        | 437 (3.08%)                  | 312 (2.36%)         |
| Benzodiazepine                    | 271 (20.45%)                 | 172 (15.52%)        | 271 (1.91%)                  | 172 (1.30%)         |
| Antispasmodic                     | 46 (3.47%)                   | 33 (2.98%)          | 46 (0.32%)                   | 33 (0.25%)          |
| NSAID <sup>c</sup>                | 45 (3.40%)                   | 35 (3.16%)          | 45 (0.32%)                   | 35 (0.26%)          |
| Butalbital-Acetaminophen-Caffeine | 22 (1.66%)                   | 11 (0.99%)          | 22 (0.16%)                   | 11 (0.08%)          |
| Anticholinergics                  | 10 (0.75%)                   | 1 (0.09%)           | 10 (0.07%)                   | 1 (0.01%)           |
| Proton Pump Inhibitor             | 5 (0.38%)                    | 4 (0.36%)           | 5 (0.04%)                    | 4 (0.03%)           |
| Barbiturate Sedatives             | 5 (0.38%)                    | 0 (0%)              | 5 (0.04%)                    | 0 (0%)              |
| Sedative Hypnotics                | 4 (0.30%)                    | 7 (0.63%)           | 4 (0.03%)                    | 7 (0.05%)           |
| Antitussives                      | 2 (0.15%)                    | 0 (0%)              | 2 (0.01%)                    | 0 (0%)              |

|                             |           |              |           |             |
|-----------------------------|-----------|--------------|-----------|-------------|
| Antidiarrheal Agents        | 2 (0.15%) | 4 (0.36%)    | 2 (0.01%) | 4 (0.03%)   |
| Central Alpha Agonist       | 2 (0.15%) | 2 (0.18%)    | 2 (0.01%) | 2 (0.02%)   |
| Antiplatelet Agents         | 1 (0.08%) | 0 (0%)       | 1 (0.01%) | 0 (0%)      |
| Butalbital-Aspirin-Caffeine | 1 (0.08%) | 0 (0%)       | 1 (0.01%) | 0 (0%)      |
| Hydrocodone Homatropine     | 1 (0.08%) | 0 (0%)       | 1 (0.01%) | 0 (0%)      |
| Appetite Stimulants         | 1 (0.08%) | 0 (0%)       | 1 (0.01%) | 0 (0%)      |
| Atypical antipsychotics     | 1 (0.08%) | 0 (0%)       | 1 (0.01%) | 0 (0%)      |
| Sulfonylureas               | 0 (0%)    | 1 (0.09%)    | 0 (0%)    | 1 (0.01%)   |
| Progestins                  | 0 (0%)    | 2 (0.18%)    | 0 (0%)    | 2 (0.02%)   |
| Other <sup>d</sup>          | 0 (0%)    | 126 (11.37%) | 0 (0%)    | 126 (0.95%) |

a Absolute change refers to the change for a medication class among reported PIMS

b Relative change refers to the change for a medication class accounting for all medication prescribed

c NSAID=Nonsteroidal anti-inflammatory drug

d Medications that did not fit into the prelisted drug classes

NOTE: PIM= Potentially Inappropriate Medication

Change of potentially inappropriate medications (PIMs) rates by drug class between **pre-implementation** and **post-implementation** periods

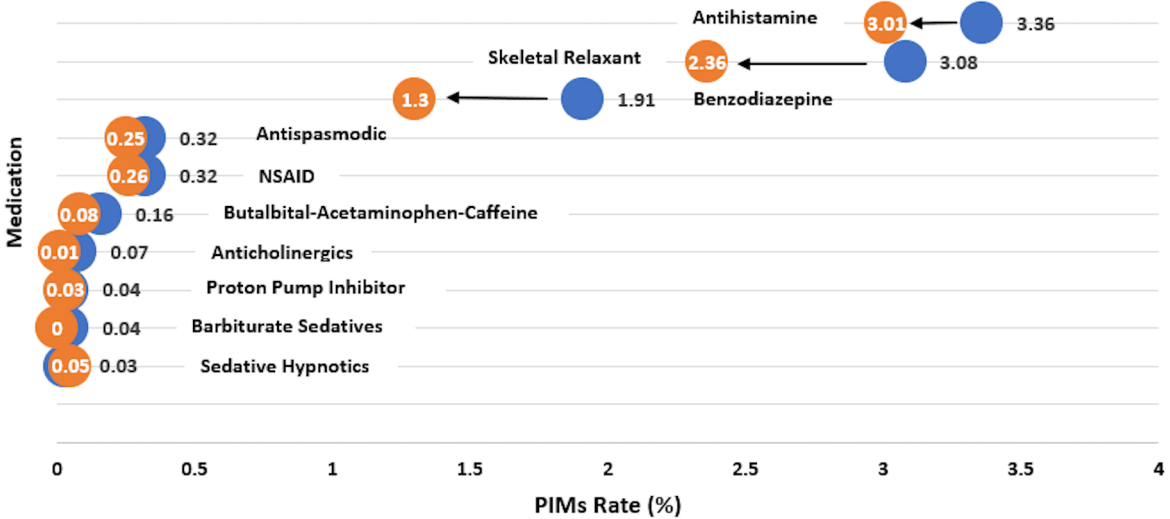

Supplement: NIHMS1819105-supplement-Supinfo.pdf [file NIHMS1819105-supplement-Supinfo.pdf]
